1 Comparison of Japanese nurse practitioner-led care and physician  
2 trainees-led care on patients' length of stay in a secondary emergency  
3 department: A retrospective study

4  
5 short title

6 The efficiency of Japanese nurse practitioner-led care in a secondary emergency  
7 department: A retrospective study

8  
9 Keichi URANAKA<sup>1,2\*</sup>, Hitoshi TAKAIRA<sup>3</sup>¶, Ryoji SHINOHARA<sup>4</sup>¶, Zentaro YAMAGATA<sup>5</sup>¶

10

11 <sup>1</sup> Division of Nursing Postgraduate School, Tokyo Healthcare University, Japan

12 <sup>2</sup> Integrated Graduate School of Medicine, Engineering, and Agricultural Sciences, University of  
13 Yamanashi, Chuo City, Japan

14 <sup>3</sup> National Hospital Organization Disaster Medical Center, Tokyo City, Japan

15 <sup>4</sup> Center for Birth Cohort Studies, University of Yamanashi, Chuo City, Japan

16 <sup>5</sup> Department of Health Science, Basic Science for Clinical Medicine, Division of Medicine,  
17 Graduate School Department of Interdisciplinary Research, University of Yamanashi, Chuo  
18 City, Japan

19

20 \* Corresponding author

21 Email: [k-uranaka@thcu.ac.jp](mailto:k-uranaka@thcu.ac.jp) (KU)

22 ¶These authors contributed equally to this work.

23

24

## 25 **Abstract**

### 26 **Objectives**

27 We compared nurse practitioner-led care and physician trainees-led care on patients' length of  
28 stay in a secondary emergency department in Japan.

### 29 **Methods**

30 This observational research utilized a secondary data analysis of medical records. Participants (N  
31 = 1,419; mean age =  $63.9 \pm 23.4$  years; 52.3% men) were patients who were transferred to the  
32 emergency department by an ambulance between April 2016 and March 2018 in western Tokyo.  
33 Multiple linear regression analyses were performed with the length of stay as the dependent  
34 variable and the factors related to the length of stay, including medical care leaders, as the  
35 independent variable to compare Japanese nurse practitioner-led care and physician trainees-led  
36 care on patients' length of stay.

### 37 **Results**

38 Approximately half of the patients ( $n = 763$ ; 53.8%) received Japanese nurse practitioner-led  
39 care. Patients' length of stay was significantly shorter by six minutes in the Japanese nurse  
40 practitioner-led care group than the physician trainees-led care group.

### 41 **Conclusion**

42 Patients' length of stay was significantly shorter by six minutes in the Japanese nurse practitioner  
43 group than the physician trainees' group. This time difference suggests that the medical care led  
44 by Japanese nurse practitioners is more efficient. In the future, the cost-effectiveness of Japanese  
45 nurse practitioner medical care, safety, and patient satisfaction should be examined in a multi-

46 institutional joint study.

47

## 48 **Introduction**

49 Demand for emergency medicine is increasing annually, with an increase in the number of  
50 presentations to hospitals [1]. However, owing to the uneven distribution of physicians and the  
51 enforcement of work training time limits for trainee physicians [2–4], the workload of  
52 emergency physicians is high. In addition, owing to the serious shortage of emergency  
53 department staff, emergency departments (EDs) face problems such as increased waiting time  
54 and length of stay for patients. The extension of the length of stay is associated with higher  
55 mortality rates [5–7] and prolonged hospital length of stay [8], which increases patients' medical  
56 costs and reduces patient satisfaction [9–10].

57 To solve these problems, health services have been remodeled significantly in response to  
58 healthcare demands. Increased public uptake of care provided by specialists, including nurse  
59 practitioners (NPs), can reduce care latency [11]. In primary care and emergency medicine, NPs  
60 are being introduced worldwide as a solution to these noted problems [12–14], and patients'  
61 waiting time and dissatisfaction are declining [15].

62 NPs are registered and certified nurses who have been educated to function autonomously and  
63 cooperatively in advanced and extended clinical roles. The Advanced Practice Nursing  
64 Regulations Consensus Model in 2008 provides primary, continuous, and comprehensive care—  
65 including comprehensive medical history; physical examinations and other health assessments  
66 and screening activities; the diagnosis, care, and management of acute and chronic patients and  
67 diseases; order and conduct laboratory examinations and imaging examinations; interpret  
68 examination results; prescribe drugs; use medical devices; and provide explanations to patients

69 [16]. The International Council of Nurses [17] also defines an NP as a registered nurse with  
70 expert knowledge, complex decision-making skills, and clinical competence—with legislated  
71 extensions for expanded practice. NPs have acquired advanced knowledge and skills regarding  
72 pathophysiology, physical assessment, and pharmacology, which undergraduate programs in  
73 many countries cover to some degree, but not in-depth as in the NP programs. They are clinically  
74 trained, hold master’s degrees, and are certified. The number of NPs is increasing annually: there  
75 are 290,000 in the United States [18], 5,697 in Canada [19], and 1,839 in Australia [20]. In  
76 addition, emergency care research has revealed that NPs provide a valuable, safe, and effective  
77 service [21–23].

78 When patients receive care from NPs and physicians in EDs, their length of stay is shorter  
79 than those who receive care from physicians only [12–14]. The claim in these studies was that  
80 NPs had a beneficial effect on patients’ length of stay in the ED. However, other previous studies  
81 revealed no significant difference in patients’ length of stay in the ED between an NP-provided  
82 care group and a physician-provided care group [12,24]. Others demonstrated that the medical  
83 hours of an emergency physician group were significantly shorter than that of an NP group  
84 [25,26]. As such, there is no unified view on the relationship between NP-provided care and  
85 patients’ length of stay in EDs.

86 In Japan, emergency medicine faces new social issues owing to the rapidly aging population  
87 [27] and the increasing medical demand as in many countries. As a solution, Japanese nurse  
88 practitioners (JNPs) are assigned to the field of emergency care—often leading the medical care  
89 and sharing and shifting tasks with physicians. JNPs commenced education in 2008 in a  
90 postgraduate master’s degree program [28]. JNP students will intensively study advanced  
91 medical and nursing education and acquire the ability to assist in a broader scope of practice than

92 nurses. Currently, 11 postgraduate schools are members of the Japanese Organization of Nurse  
93 Practitioner Faculties, and the students must pass the certification qualification test to be certified  
94 as a JNP. By March 2020, 487 nurses have been certified by the Japanese Organization of Nurse  
95 Practitioner Faculties. However, in Japan, no formal legislative status has been established for  
96 NPs [29], and JNP certification is not a national qualification. The scope of practice for JNPs is  
97 similar to that of US NPs in restricted practice. Currently, JNP must not prescribe and practice  
98 medicine without a physician's instructions. There are two types of physician's instructions:  
99 specific instructions and comprehensive instructions. Nurses assist in medical action under the  
100 physician's specific instructions. They must not take medical actions that carry the risk of  
101 harming a person's health if it is not done by a physician. On the other hand, JNPs can perform  
102 specific actions (e.g., arterial punctures, correction of dehydration by intravenous drip, and  
103 adjusting the respiratory settings) based on comprehensive instructions from physicians and  
104 procedures prepared by physicians.

105 In EDs, JNPs have acquired and practiced the knowledge, skills, and thought processes  
106 necessary for medical care, such as physical examinations, clinical reasoning, differential  
107 diagnosis, test selections, and the interpretation of test results. However, few previous studies  
108 have examined the care outcomes of JNPs' care in the EDs. Although the scope of practice of  
109 JNPs is not yet at an international standard, there is a need to generate evidence for the  
110 development of JNPs under current law. Therefore, we evaluated these JNPs' efficiency in a  
111 Japanese ED. The objective of this study was to compare JNP-led care and physician trainees-led  
112 care on patients' length of stay in a secondary ED.

113

## 114 **Methods**

## 115 **Design**

116 This was an observational study with a secondary data analysis of medical records.

## 117 **Setting**

118 This study was conducted in a medical institution in western Tokyo. At the target facility, the ED  
119 was available 24 hours a day to accept emergency patients. The JNP care model at the target  
120 facility is a collaborative model focusing on managing patients in a secondary ambulance  
121 service. During day shifts, both a JNP and physician trainees involved in care under the  
122 instruction and supervision of emergency physicians share patient information closely with  
123 emergency physicians. Regarding the assignment of patients, it is determined based not on the  
124 patients' disease or condition but on the rotation system of the medical team in the ED. There is  
125 no waiting time and no triage because the patient arrived and the JNP or physician trainees-led  
126 care of the patient began. Two nurses who were residents and in charge of the EDs worked with  
127 JNP and physician trainees during the day shift.

## 128 **Participants**

129 Key inclusion criteria were patients who were transferred to the secondary ED by an ambulance  
130 during the day shift (8:30 to 17:15) between April 2016 and March 2018. The reason for this  
131 criterion was that the ED at the target facility only accepted patients transported by ambulance.  
132 In addition, because the JNP worked only the day shift, we limited patients transported on the  
133 day shift to control for confounding due to differences in the work shift in which they were  
134 transported and excluded patients who were transferred on weekends and holidays.

## 135 **Data collection**

136 The data of this study were collected from the medical records. The records described by JNPs

137 and physician trainees are officially recorded in patients' electronic medical records with the  
138 approval of the emergency physicians. Electronic medical records are a platform used by medical  
139 professionals as well as administrative and accounting staff. We extracted the data of patients'  
140 characteristics: their admission time to the ED; the presence of trauma, testing, and medical care;  
141 the discharge time from the ED; the number of tertiary emergency patients (TEPs) at the time of  
142 the participants' arrival; and the consultations with other departments. These data were entered  
143 into a research dataset. In addition, the data used in the analysis were verified among the co-  
144 authors for transcription errors from the medical records to ensure reliability.

## 145 **Measurements**

### 146 **Length of stay**

147 The length of stay was the primary outcome in this study. The length of stay in the ED was  
148 calculated as the difference between the time the patients were admitted and discharged to the  
149 ED in minutes. The admission time of patients was recorded by the ambulance team and entered  
150 as the reception time in the patients' medical records. Patients' discharge time was recorded in  
151 the medical record by the emergency nurses.

### 152 **Care leaders**

153 Those who recorded the following initial practices were deemed to have led the care; clinical  
154 reasoning, differential diagnosis, test selection, interpretation of test results, tentative diagnosis,  
155 and decision on a course of treatment in the ED. The JNP had a rigorous checklist of patients  
156 assigned to initial care for annual activity reports to the hospital. We classified care leaders based  
157 on the checklist and reviewed the medical records with the researcher and JNP to verify the  
158 classification. As it is often urgent to treat a patient in an ED, the JNP may lead the care, and a  
159 physician trainee records it, and vice versa. Therefore, it does not matter who wrote the medical

160 record.

161 The JNP had 11 years of experience as a nurse and three years of experience as a JNP after  
162 completing the Japanese Organization of Nurse Practitioner Faculties -accredited postgraduate  
163 master's degree and was dedicated to the ED for the period under study. The physician trainees  
164 were licensed to practice medicine as a physician for less than two years and in charge of the ED  
165 during the rotation period. If the EDs were too crowded, physician trainees were in charge of the  
166 outpatients in parallel with the JNP. When a JNP was off duty or absent, physician trainees  
167 played the role of care on behalf of the JNP in the ED.

### 168 **Other factors related to the length of stay**

169 For factors related to the length of stay, based on earlier research, we examined care leader type  
170 [30,31]; patients' age and sex [31,32]; whether they received clinical tests test including x-ray  
171 photographs (XPs), computed tomography (CT), magnetic resonance imaging (MRI) [31], and  
172 blood tests [33]; catheterization [34], endoscopy, and trauma [32] characteristics; outcomes (i.e.,  
173 return home or hospitalization, including transfers); the number of consultations with other  
174 departments; and the number of tertiary emergency patients when the participants arrived at the  
175 hospital. The number of tertiary emergency participants may affect the length of stay of  
176 secondary emergency patients [35]. Tertiary emergency patients require hospitalization and  
177 human resources such as physicians and nurses, and they are given priority over secondary  
178 emergency patients for testing. Therefore, secondary emergency patients often wait longer for  
179 tests than tertiary emergency patients.

### 180 **Analysis**

181 We calculated descriptive statistics, including a simple tabulation for each variable and mean ( $\pm$   
182 standard deviation) of the length of stay. The correlations between the variables were calculated



183 using Spearman’s correlation coefficients, the tetrachoric correlation coefficient [36], and the  
184 point-biserial correlation coefficient [37] depending on the type of scale. In addition, simple  
185 linear regression analyses were performed with the length of stay as the dependent variable and  
186 the factors related to the length of stay as the independent variable. Then, a multiple linear  
187 regression analysis was performed. P-values < .05 were deemed significant. Stata version 15  
188 (Stata Corp LLC, Lakeway, TX, USA) was used for all statistical analyses.

## 189 **Ethics Considerations**

190 This study received ethical approval from the Institutional Review Board of the hospital (no.  
191 2018-24) and the university (no. 2072). Informed consent was obtained in the form of opt-out on  
192 the hospital’s website. No participants refused to participate.

193

## 194 **Results**

### 195 **Participants’ characteristics**

196 The number of participants analyzed was 1,419, and the patients’ length of stay ranged from 6 to  
197 486 minutes (mean = 142.9, SD = 68.6 minutes; median = 134, interquartile range = 88 minutes).

198 Table 1 illustrates the participants’ characteristics. Specifically, 52.3% were men, and 47.7%  
199 were women. The patients’ mean age was 63.9 (SD = 23.4) years. Further, 53.8% received JNP  
200 care, and 46.2% did not, 62.9% of the participants were non-traumatic, and 37.1% were  
201 traumatic, and 1,052 (74.1%) had no TEPs when they arrived at the hospital. The outcomes were  
202 50.0% for both returning home and hospitalization, including transfer to another hospital. There  
203 were 340 patients (24.0%) who did not see other departments, and most (88.6%) had blood tests.

204 In contrast, 0.2% had an endoscopy, 8.9% received an MRI test, and 0.4% received a  
205 catheterization.

206 **Table 1. Characteristics of the patients and length of stay in the ED**

Table 1 Characteristics of the patients and length of stay in the ED (N=1,419)

| Variables              |                    | n     | %    | length of stay (minutes) |      |
|------------------------|--------------------|-------|------|--------------------------|------|
|                        |                    |       |      | Mean                     | SD   |
| <b>Care leader</b>     | physician trainees | 656   | 46.2 | 142.4                    | 67.2 |
|                        | JNP                | 763   | 53.8 | 143.3                    | 69.9 |
| <b>Age<sup>a</sup></b> | year               |       |      | 63.9                     | 23.4 |
| <b>Sex</b>             | female             | 677   | 47.7 | 142.2                    | 66.4 |
|                        | male               | 742   | 52.3 | 143.6                    | 70.6 |
| <b>Trauma</b>          | non-trauma         | 892   | 62.9 | 146.4                    | 66.4 |
|                        | trauma             | 527   | 37.1 | 137.0                    | 71.9 |
| <b>TEP</b>             | 0                  | 1,052 | 74.1 | 141.5                    | 68.1 |
|                        | 1                  | 308   | 21.7 | 145.4                    | 67.3 |
|                        | 2                  | 51    | 3.6  | 166.3                    | 82.3 |
|                        | 3                  | 8     | 0.6  | 90.3                     | 40.2 |
| <b>Outcomes</b>        | return home        | 710   | 50.0 | 124.9                    | 64.4 |
|                        | hospitalization    | 709   | 50.0 | 160.9                    | 68.0 |
| <b>Consultation</b>    | 0                  | 340   | 24.0 | 130.1                    | 57.5 |
|                        | 1                  | 806   | 56.8 | 137.8                    | 69.2 |
|                        | 2                  | 225   | 15.9 | 169.6                    | 72.4 |
|                        | 3                  | 42    | 3.0  | 194.4                    | 62.7 |
|                        | 4                  | 6     | 0.4  | 191.8                    | 25.1 |
| <b>XP</b>              | without            | 204   | 14.4 | 100.9                    | 62.6 |
|                        | with               | 1,215 | 85.6 | 150.0                    | 67.1 |
| <b>CT</b>              | without            | 489   | 34.5 | 111.6                    | 58.4 |
|                        | with               | 930   | 65.5 | 159.4                    | 67.9 |
| <b>MRI</b>             | without            | 1,292 | 91.1 | 137.2                    | 64.9 |
|                        | with               | 127   | 8.9  | 201.4                    | 78.0 |
| <b>Blood test</b>      | without            | 162   | 11.4 | 82.1                     | 46.4 |
|                        | with               | 1,257 | 88.6 | 150.8                    | 67.1 |
| <b>Catheterization</b> | without            | 1,413 | 99.6 | 143.1                    | 68.6 |
|                        | with               | 6     | 0.4  | 97.0                     | 43.6 |
| <b>Endoscopy</b>       | without            | 1,391 | 98.0 | 142.5                    | 68.5 |
|                        | with               | 28    | 0.2  | 165.4                    | 72.1 |

ED= emergency department, N and n= number, SD= standard deviation

JNP= Japanese nurse practitioner

TEP= tertiary emergency patients; number of tertiary emergency patients when the subjects arrived at the hospital

XP= x-ray photography, CT= computerized tomography

MRI= magnetic resonance imaging

208

209 **The relationship between the length of stay and care leader**

210 Correlations between the independent variables were examined to avoid multicollinearity in the  
211 multiple regression analysis. The variables that had a significant correlation with the length of  
212 stay were age, trauma, outcomes, consultation, and XP, CT, MRI, and blood tests. The  
213 correlations ranged from -0.066 ( $p < .05$ ) to 0.331 ( $p < .01$ ; Table 2).

214 **Table 2. Correlation coefficient between variables**

Table 2 Correlation coefficient between variables (N=1,419)

| Variables       | LOS                 | CI                 | Age                 | Sex                      | Trauma                    | TEP                 | Oc                       | Cons               | XP                       | CT                       | MRI                | Bt           | Cath          |
|-----------------|---------------------|--------------------|---------------------|--------------------------|---------------------------|---------------------|--------------------------|--------------------|--------------------------|--------------------------|--------------------|--------------|---------------|
| Care leader     | 0.006               |                    |                     |                          |                           |                     |                          |                    |                          |                          |                    |              |               |
| Age             | 0.244 <sup>b</sup>  | 0.013              |                     |                          |                           |                     |                          |                    |                          |                          |                    |              |               |
| Sex             | 0.010               | 0.022              | -0.069 <sup>b</sup> |                          |                           |                     |                          |                    |                          |                          |                    |              |               |
| Trauma          | -0.066 <sup>b</sup> | 0.041              | -0.259 <sup>b</sup> | -0.119 <sup>b</sup>      |                           |                     |                          |                    |                          |                          |                    |              |               |
| TEP             | 0.033               | 0.032              | -0.021              | 0.000                    | -0.034                    |                     |                          |                    |                          |                          |                    |              |               |
| Outcomes        | 0.262 <sup>b</sup>  | 0.003              | 0.259 <sup>b</sup>  | 0.116 <sup>a</sup>       | -0.192 <sup>b</sup>       | -0.060 <sup>a</sup> |                          |                    |                          |                          |                    |              |               |
| Consultation    | 0.202 <sup>b</sup>  | 0.176 <sup>b</sup> | 0.103 <sup>b</sup>  | -0.012                   | 0.152 <sup>b</sup>        | -0.004              | -0.018                   |                    |                          |                          |                    |              |               |
| XP              | 0.251 <sup>b</sup>  | 0.037              | 0.299 <sup>b</sup>  | 0.021                    | -0.010                    | -0.045              | <b>0.754<sup>b</sup></b> | 0.092 <sup>b</sup> |                          |                          |                    |              |               |
| CT              | 0.331 <sup>b</sup>  | 0.053              | 0.206 <sup>b</sup>  | 0.085                    | -0.078                    | -0.056 <sup>a</sup> | 0.364 <sup>b</sup>       | 0.186 <sup>b</sup> | 0.223 <sup>b</sup>       |                          |                    |              |               |
| MRI             | 0.267 <sup>b</sup>  | -0.014             | 0.898 <sup>b</sup>  | 0.028                    | -0.275 <sup>b</sup>       | 0.001               | 0.374 <sup>b</sup>       | 0.070 <sup>b</sup> | 0.183 <sup>a</sup>       | 0.475 <sup>b</sup>       |                    |              |               |
| Blood test      | 0.318 <sup>b</sup>  | 0.156 <sup>b</sup> | 0.414 <sup>b</sup>  | 0.107                    | <b>0.596<sup>b</sup></b>  | -0.041              | <b>0.860<sup>b</sup></b> | 0.034              | <b>0.552<sup>b</sup></b> | <b>0.581<sup>b</sup></b> | 0.427 <sup>b</sup> |              |               |
| Catheterization | -0.044              | -0.032             | 0.027               | <b>1.000<sup>a</sup></b> | <b>-1.000<sup>a</sup></b> | 0.022               | <b>1.000</b>             | 0.001              | <b>1.000</b>             | -0.136                   | 0.130              | <b>1.000</b> |               |
| Endoscopy       | 0.046               | -0.002             | 0.043               | 0.126                    | <b>-0.513<sup>b</sup></b> | 0.049               | 0.407                    | 0.022              | <b>1.000<sup>a</sup></b> | -0.233 <sup>a</sup>      | -0.179             | <b>1.000</b> | <b>-1.000</b> |

For the continuous variables, Spearman's correlation coefficient were calculated between them.

The continuous and binary variables were calculated Point-biserial correlations coefficients.

Binary variables and binary variables were calculated Tetrachoric correlation coefficient.

<sup>a</sup> p < .05, <sup>b</sup> p < .01, bold: an absolute value of 0.500 or more

N= number, LOS= length of stay;minutes, CI= Care leader, Oc= Outcomes, Cons= Consultation, Bt= Blood test, Cath= Catheterizaion

TEP= tertiary emergency patients; the number of tertiary emergency patients when the subjects arrived at the hospital.

XP= x-ray photography, CT= computerized tomography, MRI= magnetic resonance imaging

The reference of care leader variable was "physician trainees".

The reference of sex variable was "female".

The reference of trauma variable was "non-trauma".

The reference of outcomes variable was "return home".



217 To clarify the relationship between the length of stay and each variable, a simple linear  
218 regression analysis was performed using the length of stay as the dependent variable. No  
219 significant relationship was found between the length of stay and care leader (unstandardized  
220 coefficient: 0.88; 95% CI: -6.29 to 8.05). The variables with significant associations were age,  
221 consultation, MRI, blood test, trauma, outcomes, CT, and XP (Table 3).

222 A multiple linear regression analysis was performed to clarify the relationship between the  
223 length of stay and care leader after adjusting for other variables. To avoid multicollinearity in the  
224 multiple regression analysis, we built the models so that no variables with absolute values of  
225 correlation coefficients greater than 0.500 were included concurrently. The length of stay was the  
226 dependent variable, and the independent variables were care leader, age, sex, tertiary emergency  
227 patients, endoscopy, consultation, MRI, and blood test.

228 The results of the multiple linear regression analysis demonstrated that there was a significant  
229 relationship between the length of stay and the care leader. The length of stay of the patients was  
230 significantly shorter by six minutes in the JNP group compared to the physician trainees' group  
231 (-6.67; -13.21 to -0.13). The other significant variables were age (0.23; 0.08 to 0.38), TEPs (6.30;  
232 0.62 to 11.99), consultation (17.60; 13.20 to 22.00), MRI (53.26; 41.96 to 64.56), and blood test  
233 (56.47; 45.31 to 67.64; Table 3).

234 **Table 3. Association of length of stay in the ED with care provider**

Table 3 Association of length of stay in the ED with care provider (N=1,419)

| Variables              |                     | n    | crude                  | adjusted              |                       |
|------------------------|---------------------|------|------------------------|-----------------------|-----------------------|
|                        |                     |      |                        | Model 1               | Model 2               |
|                        |                     |      |                        | B(95%CI)              | B(95%CI)              |
| <b>Care leader</b>     | physicians trainees | 656  | reference              | reference             | reference             |
|                        | JNP                 | 763  | 0.88(-6.29 - 8.05)     | -6.67(-13.21 - -0.13) | -6.76(-13.30 - -0.22) |
| <b>Age</b>             | year                |      | 0.66(0.51 - 0.81)      | 0.23(0.08 - 0.38)     | 0.25(0.10 - 0.41)     |
| <b>Sex</b>             | female              | 677  | reference              | reference             | reference             |
|                        | male                | 742  | 1.33(-5.82 - 8.49)     | 0.08(-6.36 - 6.53)    | 0.51(-5.95 - 6.97)    |
| <b>TEP</b>             | person              |      | 4.16(-2.18 - 10.49)    | 6.30(0.62 - 11.99)    | 6.54(0.85 - 12.23)    |
| <b>Endoscopy</b>       | without             | 1391 | reference              | reference             | reference             |
|                        | with                | 28   | 22.89(-2.78 - -48.56)  | 14.23(-8.86 - 37.31)  | 16.05(-7.11 - 39.21)  |
| <b>Consultation</b>    | case                |      | 19.80(15.11 - 24.49)   | 17.60(13.20 - 22.00)  | 16.84(12.36 - 21.32)  |
| <b>MRI</b>             | without             | 1292 | reference              | reference             | reference             |
|                        | with                | 127  | 64.18(52.11 - 76.25)   | 53.26(41.96 - 64.56)  | 54.23(42.88 - 65.58)  |
| <b>Blood test</b>      | without             | 162  | reference              | reference             | reference             |
|                        | with                | 1257 | 68.62(57.96 - 79.27)   | 56.47(45.31 - 67.64)  | 58.73(47.29 - 70.17)  |
| <b>Trauma</b>          | without             | 892  | reference              |                       | reference             |
|                        | with                | 527  | -9.37(-16.75 - -1.99)  |                       | 6.44(-0.82 - 13.70)   |
| <b>Outcomes</b>        | return home         | 710  | reference              |                       |                       |
|                        | hospitalization     | 709  | 35.97(29.07 - 42.87)   |                       |                       |
| <b>CT</b>              | without             | 489  | reference              |                       |                       |
|                        | with                | 930  | 47.77(40.67 - 54.86)   |                       |                       |
| <b>XP</b>              | without             | 204  | reference              |                       |                       |
|                        | with                | 1215 | 49.10(39.24 - 58.97)   |                       |                       |
| <b>Catheterization</b> | without             | 1413 | reference              |                       |                       |
|                        | with                | 6    | -46.11(-101.15 - 8.92) |                       |                       |

crude: simple linear regression analysis

adjusted: multiple linear regression analysis; the models that did not include all variables that were correlated above 0.5 at the same time.

Model1: R<sup>2</sup>= 0.20, VIF= 1.01~1.24, Model2: R<sup>2</sup>=20.0, VIF= 1.01~1.30

dependent variable= Length of stay (minutes), ED= emergency department, N and n= number

B= unstandardized regression coefficient, CI= confidence interval for B, JNP= Japanese nurse practitioner

TEP= tertiary emergency patients; number of tertiary emergency patients when the subject arrives at the hospital

Consultation= number of consultations with departments other than the emergency department, MRI= magnetic resonance imaging

CT= computerized tomography, XP= x-ray photography

S1 Table, we showed the results of multiple linear regression analysis for exploring confounding factors for LOS and care providers.

S2 Table, we showed that in Model 2, replacing trauma with either Outcomes, CT, or XP variables did not change the sign of the care provider's coefficients.



236

237 **Interacting factors with the care leader regarding the length of stay**  
238 **and robustness of the sign of the care leader's coefficients**

239 Due to the sign reversal in the crude and adjusted models for care leader, a multiple linear  
240 regression analysis was conducted to explore interacting factors with care leader regarding the  
241 length of stay. The sign of the care leader changed to negative only in the model with the  
242 inclusion of a consultation (S1 Table). We constructed Model 2 with the addition of trauma;  
243 however, the sign of the care leader coefficients did not change. Additionally, we demonstrated  
244 that, in Model 2, replacing trauma with outcomes, CT, or the XP variables did not change the  
245 sign of the care leaders' coefficients (S2 Table).

246

247 **Discussion**

248 This study demonstrated that patients' length of stay was significantly shorter by six minutes in  
249 the JNP group than in the physician trainees group. In any of the multiple regression models that  
250 trauma, outcomes, CT, and XP were entered into, the sign of care leaders' coefficient remained  
251 the same and was negative. This suggests that the efficiency of JNP-led care is more efficient  
252 than the care led by physician trainees. To our knowledge, this was the first study to demonstrate  
253 the outcome of JNP-led care in a secondary ED in Japan. However, it should be noted that all  
254 patients received care at a secondary ED during weekday shifts.

255 The allegation in the following studies was that the NPs had a beneficial effect on patients'  
256 length of stay. A study conducted in the ED of a small city found that the median length of stay  
257 of the NP-provided patient group was 77 minutes, compared to the 174 minutes of the NP and

258 emergency physician-provided group [12]. Further, a cohort study in the ED of a community  
259 hospital in an urban area revealed the following findings:  $85 \pm 56$  minutes in the physician group  
260 and  $65 \pm 42$  in the emergency NP group [13]. A study of outpatients in the ED with levels  
261 ranging from non-urgent to potentially life-threatening revealed a median length of stay of 94  
262 minutes in the NP-provided care group and 170 minutes in the patient group who received  
263 conventional care [14]. Although the results cannot be fully generalized because our study was  
264 conducted in Japan and NPs' work styles and work contents may differ, our findings support  
265 previous studies that NP-provided care is associated with shortened length of stay among ED  
266 patients.

267 Concerning the method, some previous studies adjusted the bias of patients' severity and  
268 urgency by stratifying the NP-provided medical care group and physicians' medical care group  
269 by triage category [12,14,15]. Unlike previous studies, to address these biases, the current study  
270 limited participants to patients who were treated at a secondary ED. In addition, we adjusted for  
271 patients' characteristics and whether they received tests in the multivariate analyses, which still  
272 revealed that the NP-led group had a significantly shorter length of stay than the physician  
273 trainees-led group.

274 The following previous studies also suggest that NP-provided care is not inferior to physician-  
275 provided care. A case-control study of 725 emergency outpatients who came home with  
276 orthopedic disease demonstrated that the median length of stay in the conventional system  
277 without NP was 137 minutes and 125 minutes with NP, which was non-significant [24]. Steiner  
278 et al. [12] found that the length of stay was 123 minutes for the emergency physician-provided  
279 patients and 125 minutes for those provided with care by the emergency physicians and NP,  
280 which was non-significant ( $p = .13$ ). In contrast, in a study investigating patients who returned

281 home after visiting the ambulatory care clinic, the median length of stay for the physician-  
282 provided group was 143 minutes, and the NP-provided was 156 minutes, which was a significant  
283 difference [15]. In one study that evaluated physicians' and NPs' care for minorly injured  
284 patients in an emergency facility, the average care time of the physician group was 12 minutes  
285 shorter than the NP group [25]. In these previous studies, the NP-provided group had a longer  
286 length of stay than the physician-provided group in the ED, which contrasts our findings. We  
287 cannot deny the existence of publication bias—that only favorable results concerning NPs are  
288 published. However, our study suggests that there is no disadvantage to patients' length of stay  
289 by receiving care from a JNP instead of a physician.

290 The length of stay is defined by the performance of four processes: medical care in the ED,  
291 medical care of specialized medical departments, ward coordination, and movement. In  
292 particular, the medical care in the ED includes the time related to interviews, physical  
293 examinations, judgment and implementation of various tests, interpretation of test results,  
294 provisional diagnosis, consultation with other departments, and treatment policy decisions.  
295 Therefore, the length of stay reflects not only the power of the department in charge but also the  
296 speed of cooperation among various departments within the hospital.

297 The results of our study, adjusted for patients' characteristics and whether medical tests were  
298 conducted, suggested that the care led by the JNP could shorten patients' length of stay. As  
299 illustrated in Appendix 1, the coefficients' direction was negative when the independent  
300 variables were care leader and consultation variables. The JNP group tended to spend about four  
301 minutes less time in the ED than the physician trainee group concerning consultations with other  
302 departments. The shorter length of stay may be owing to the relationship between other  
303 departments and other factors depending on the skill and experience of the individual JNP and

304 their ability to coordinate. This is probably because JNPs collaborate with various departments in  
305 the hospital more accurately and quickly than physician trainees. The JNPs are more likely to  
306 have more years of employment in hospitals than physician trainees, and they may be familiar  
307 with the hospital system and culture. The results suggest that JNPs are equivalent or greater to  
308 physician trainees in their efficiency and ability to manage patients.

309 A previous study compared NPs and nurses and examined patients' length of stay in the ED  
310 [38]. In that study, the mean length of stay of patients with NP-led care was 73 minutes, while  
311 that of patients with nurse-led care was 98 minutes. The NPs could assess the test order, interpret  
312 test results, and provide medical care (including triage). Certainly, nurses may reduce patients'  
313 length of stay in EDs by improving manuals, operations, and triage skills. However, NPs have a  
314 better ability to understand pathological conditions, provide necessary tests, and provide  
315 predictive care than nurses, and they are often involved in medical care. Therefore, it was  
316 considered that they are directly involved in decreasing patients' length of stay.

317 Another advantage of introducing JNPs in the ED is that the quality of medical care is  
318 improved. For example, NPs can lead medical care for patients with mild conditions, and  
319 physicians can focus on treating patients with more severe and complicated diseases. In recent  
320 years, there has been a shortage of emergency physicians owing to the uneven distribution of  
321 physicians [39], and a work style reform law has promoted restrictions on physicians' ability to  
322 work overtime [40]. Consequently, JNPs reduce emergency physicians' work-related burdens. In  
323 addition, JNPs enable smoother collaboration and task sharing between physicians and nurses.  
324 The introduction of JNPs will lead to investment in hospital organizations and benefit patients,  
325 families, and team care [41]. Thus, policymakers should consider introducing JNP in secondary  
326 emergency outpatients to address the limitations mentioned above in medical settings.

327 **Strengths**

328 The strengths of this study are the number of participants and the use of objective medical record  
329 data. We assessed one JNP at one target facility; therefore, the internal validity is maintained. In  
330 addition, we can compare our results to those of previous studies conducted overseas.

331 **Limitations**

332 As this was a retrospective survey, the accuracy and completeness of the data are lacking owing  
333 to the difference in record keeping. Further, it is undeniable that the data may comprise typing  
334 errors as it was extracted from the emergency outpatient transport patient records and entered  
335 into the research dataset. Moreover, the external generalizability of our results is limited since  
336 our data reflect the practice of one JNP working at one site. Patients were admitted during the  
337 day on weekdays; therefore, data concerning nighttime and weekend/holiday cases were not  
338 included. The results should thus be generalized with caution. Further, a multivariate analysis  
339 was performed using nine variables. The coefficient of determination ( $R^2$ ) of the multiple linear  
340 regression analysis model in this study was 0.20. The remaining 80% of the length of stay was  
341 explained by other factors that were not surveyed in this study. This study focused only on  
342 outpatient time, and we did not consider other important outcomes. In addition, we were unable  
343 to investigate the background of the physician trainees, including their years of experience.

344

345 **Conclusion**

346 The length of stay of patients was significantly shorter by six minutes in the JNP group  
347 compared to the physician trainees' group. This time difference suggests that the medical care

348 led by JNP is more efficient than that led by physician trainees. In the future, the cost-  
349 effectiveness of JNP's medical care (e.g., salary and remuneration obtained from medical care),  
350 safety (e.g., consistency between initial diagnosis and post-hospitalization diagnosis and return-  
351 to-home rate of returning patients), and patient satisfaction should be examined in a multi-  
352 institutional joint study.

353

## 354 **Acknowledgments**

355 Our special thanks to the patients who participated in the study. Special thanks are also extended  
356 to the staff members of the Department of Health Sciences, University of Yamanashi, for their  
357 any suggestions and advices to brush up on this study. We also thank Editage([www.editage.com](http://www.editage.com))  
358 for English language editing.

359

## 360 **References**

- 361 [1] Burkett E, Martin-Khan MG, Scott J, Samanta M, Gray LC. Trends and predicted trends in  
362 presentations of older people to Australian emergency departments: Effects of demand  
363 growth, population aging, and climate change. *Aust Health Rev.* 2017; 41(3): 246–253. doi:  
364 10.1071/AH15165
- 365 [2] Garland A, Gershengorn HB. Staffing in ICUs: Physicians and alternative staffing models.  
366 *Chest.* 2013 143: 214–221. doi: 10.1378/chest.12-1531
- 367 [3] Kleinpell R, Ward NS, Kelso LA, Mollenkopf FP Jr, Houghton D. Patient to provider ratios  
368 for nurse practitioners and physician assistants in the ICU: Results from a national survey.  
369 *Am J Critical Care,* 2015; 24: e16–e21. doi: 10.4037/ajcc2015274
- 370 [4] Ward NS, Afessa B, Kleinpell R, Tisherman S, Ries M, Howell M, Members of Society of

- 371 Critical Care Medicine Taskforce on ICU Staffing. Intensivist/patient ratios in closed ICUs:  
372 A statement from the Society of Critical Care Medicine Taskforce on ICU Staffing. *Critical*  
373 *Care Medi*, 2013; 41: 638–645. doi: 10.1097/CCM.0b013e3182741478
- 374 [5] Benjamin C, Renee Y, Robert Y, David Z, Li-Jung L, Woijuan H, et al. Effect of emergency  
375 department crowding on outcomes of admitted patients. *Ann Emerg Medi*, 2013 61(6):  
376 605–611. doi: 10.1016/j.annemergmed.2012.10.026
- 377 [6] Chang AM, Cohen DJ, Lin A, Augustine J, Handel DA, Howell E, et al. Hospital strategies  
378 for reducing emergency department crowding: A mixed-methods study. *Ann Emerg Medi*,  
379 2018; 71(4): 497–505 e494. doi: 10.1016/j.annemergmed.2017.07.022
- 380 [7] Singer AJ, Thode HC Jr, Viccellio P, Pines JM. The association between length of  
381 emergency department boarding and mortality. *Acad Emerg Medi*, 2011; 18(12): 1324–  
382 1329. doi: 10.1111/j.1553-2712.2011.01236.x
- 383 [8] Drew BR. The access-block effect: Relationship between delay to reaching an inpatient  
384 bed and inpatient length of stay. *Medi J Aust*, 2002; 177: 492–495.
- 385 [9] Imperato J, Darren SM, Leon DS, Gary S. Improving patient satisfaction by adding a  
386 physician in triage. *J Hosp Adm*, 2013; 3: 7–13. doi: 10.5430/jha.v3n1p7
- 387 [10] Pines JM, Iyer S, Disbot M, Hollander JE, Shofer FS, Datner EM. The effect of emergency  
388 department crowding on patient satisfaction for admitted patients. *Acad Emerg Medi*,  
389 2008; 15(9): 825–831. doi: 10.1111/j.1553-2712.2008.00200.x
- 390 [11] Fry M, Fong J, Asha S, Arendts G. A 12-month evaluation of the impact of transitional  
391 emergency nurse practitioners in one metropolitan emergency department. *Australas Emerg*  
392 *Nurs J*, 2011; 14(1): 4–8. doi: 10.1016/j.aenj.2010.10.001
- 393 [12] Steiner IP, Nichols DN, Blitz S, Tapper L, Stagg AP, Sharma L, et al. Impact of a nurse

- 394 practitioner on patient care in a Canadian emergency department. *Can J Emerg Medi*,  
395 2009; 11(3): 207–214. doi: 10.1017/s1481803500011222
- 396 [13] van der Linden C, Reijnen R, de Vos R. Diagnostic accuracy of emergency nurse  
397 practitioners versus physicians related to minor illnesses and injuries. *J Emerg Nurs*, 2010;  
398 36(4): 311–316. doi: 10.1016/j.jen.2009.08.012
- 399 [14] Jennings N, O’Reilly G, Lee G, Cameron P, Free B, Bailey M. Evaluating outcomes of the  
400 emergency nurse practitioner role in a major urban emergency department, Melbourne,  
401 Australia. *J Clin Nurs*, 2008; 17(8): 1044–1050. doi: 10.1111/j.1365-2702.2007.02038.x
- 402 [15] Middleton S, Gardner A, Gardner G, Della P. The status of Australian nurse practitioners:  
403 The second national census. *Aust Health Rev*, 2011; 35: 448–454. doi: 10.1071/AH10987
- 404 [16] Advanced Practice Registered Nurse (APRN) Consensus Group Work Group & the  
405 National Council of State Boards of Nursing APRN Advisory Committee. Consensus  
406 Model for APRN regulation: Licensure, Accreditation, Certification, and Education. 2008.  
407 <http://www.nonpf.org/associations/10789/files/APRNConsensusModelFinal09.pdf>.
- 408 [17] International Council of Nurses. International Council of Nurses Nurse  
409 Practitioner/Advanced Practice Nursing Network. Definition and characteristics of the role.  
410 2020. <http://international.aanp.org/Practice/APNRoles>
- 411 [18] American Association of Nurse Practitioners. All about NPs. 2020.  
412 <https://www.aanp.org/about/all-about-nps/whats-a-nurse-practitioner>
- 413 [19] Canadian Nurses Association. Nurse practitioners-untapped resource. 2018.  
414 [https://cna-aiic.ca/-/media/cna/page-content/pdf-en/2019-nurse-practitioners-untapped-](https://cna-aiic.ca/-/media/cna/page-content/pdf-en/2019-nurse-practitioners-untapped-resource.pdf?la=en&hash=FD0A9731A2C7D00B3F0D23FE0A51BBF89858BCA4)  
415 [resource.pdf?la=en&hash=FD0A9731A2C7D00B3F0D23FE0A51BBF89858BCA4](https://cna-aiic.ca/-/media/cna/page-content/pdf-en/2019-nurse-practitioners-untapped-resource.pdf?la=en&hash=FD0A9731A2C7D00B3F0D23FE0A51BBF89858BCA4)
- 416 [20] Australian College of Nurse Practitioners. Annual report. 2019.



- 417 [https://www.acnp.org.au/client\\_images/2142541.pdf](https://www.acnp.org.au/client_images/2142541.pdf)
- 418 [21] McDevitt J, Melby V. An evaluation of the quality of emergency nurse practitioner services  
419 for patients presenting with minor injuries to one rural urgent care centre in the UK: A  
420 descriptive study. *J Clin Nurs*, 2015; 24(3/4): 523–535. doi: 10.1111/jocn.12639
- 421 [22] McDonnell A, Goodwin E, Kennedy F, Hawley K, Gerrish K, Smith C. An evaluation of  
422 the implementation of advanced nurse practitioner (ANP) roles in an acute hospital setting.  
423 *J Adv Nurs*, 2015; 71(4): 789–799. doi: 10.1111/jan.12558
- 424 [23] Pirret AM, Neville SJ, La Grow SJ. Nurse practitioners versus doctors diagnostic reasoning  
425 in a complex case presentation to an acute tertiary hospital: A comparative study. *Int J Nurs*  
426 *Stud*, 2015; 52(3): 716–726. doi: 10.1016/j.ijnurstu.2014.08.009
- 427 [24] Considine J, Martin R, Smit D, Winter C, Jenkins J. Emergency nurse practitioner care and  
428 emergency department patient flow: A case-control study. *Emerg Medi Australas*, 2006;  
429 18(4): 385–390. doi: 10.1111/j.1742-6723.2006.00870.x
- 430 [25] Byrne G, Richardson M, Brunson J, Patel A. An evaluation of the care of patients with  
431 minor injuries in emergency settings. *Accid Emerg Nurs*, 2000; 8(2): 101–109. doi:  
432 10.1054/aaen.2000.0102
- 433 [26] Middleton S, Gardner G, Gardner A, Considine J, Fitzgerald G, Christofis L, et al. Are  
434 service and patient indicators different in the presence or absence of nurse practitioners?  
435 The EDPRAC cohort study of Australian emergency departments. *BMJ Open*, 2019 9(7),  
436 e024529. doi: 10.1136/bmjopen-2018-024529
- 437 [27] Statistics Bureau of Japan. Current population estimates as of October 1, 2019.  
438 <https://www.stat.go.jp/english/data/jinsui/2019np/index.html>
- 439 [28] Fukuda H, Miyauchi S, Tonai M, Ono M, Magilvy JK, Murashima S. The first nurse

440 practitioner graduate programme in Japan. *Int Nurs Rev*, 2014; 61: 487–490. doi:  
441 10.1111/inr.12126

442 [29] Fougère B, Morley JE, Decavel F, Nourhashemi F, Abele P, Resnick B, et al. Development  
443 and implementation of the advanced practice nurse worldwide with an interest in geriatric  
444 care. *J Am Medi Dir Assoc*, 2016; 17(9): 782–788. doi: 10.1016/j.jamda.2016.05.009

445 [30] Erin D, Gerald ML, Kendall M. (2015). Impact of trainees on length of stay in the  
446 emergency department at an academic medical center. *South Medi J*, 2015; 108(5): 245–  
447 248.

448 [31] Stephen DG, Stephen EL, Michael S, Elizabeth E, Darren S, Julian S. Why do ‘fast track’  
449 patients stay more than four hours in the emergency department? An investigation of  
450 factors that predict length of stay. *Emerg Medi Australas*, 2018; 30(5): 641–647. doi:  
451 10.1111/1742-6723.12964

452 [32] Alexander B, Gil S, Yuri B, Dan H. The emergency department length of stay: Is the time  
453 running out? *Chin J Traumatol*, 2019; 22(3): 125–128.  
454 doi: 10.1016/j.cjtee.2019.01.008

455 [33] Holland LL, Smith LL, Blick KE. Reducing laboratory turnaround time outliers reduces  
456 emergency department patient length of stay: An 11 hospital study. *Am J Clin Path*, 2005;  
457 124(5): 672–674. doi: 10.1309/E9QP-VQ6G-2FBV-MJ3B

458 [34] Umesh NK, Michele LJ, Curtis R, Monica BK, Randall T, Saeed RS, William JB.  
459 Emergency department physician activation of the catheterization laboratory and  
460 immediate transfer to an immediately available catheterization laboratory reduce door-to-  
461 balloon time in ST-elevation myocardial infarction. *Circulation*, 2007; 116(1): 67–76.  
462 doi: 10.1161/CIRCULATIONAHA.106.677401

- 463 [35] Kasagi M, Ohtomo Y, Kawahara K. Analysis of the diversity and problems of the  
464 emergency medical system in Japan: from the viewpoint of a comparison with the North  
465 America ER system. *Journal of Japanese Assoc Acute Medi*, 2009; 20: 349-60.
- 466 [36] Pearson E. Mathematical contribution to the theory of evolution. VII. On the correlation of  
467 characters not quantitatively measurable. *Philos Trans R Soc A*, 1900; 195: 1–47. doi:  
468 10.1098/rsta.1900.0022
- 469 [37] Sheskin DJ. (5th Ed). *Handbook of parametric and nonparametric statistical procedures*.  
470 Boca Raton, FL: Chapman & Hall/CRC; 2011.
- 471 [38] Allerston J, Justham D. A case control study of the transit times through an accident and  
472 emergency department of ankle injured patients assessed using the Ottawa Ankle Rules.  
473 *Accid Emerg Nurs*, 2000; 8: 148–154. doi: 10.1054/aaen.2000.0104
- 474 [39] Matsumoto M, Inoue K, Takeuchi K. Quality of care in Japan: An additional strategy.  
475 *Lancet*, 2011; 378(9807): e17. doi: 10.1016/s0140-6736(11)61841-2
- 476 [40] Ministry of Health, Labor, and Welfare. Outline of the act on the arrangement of related  
477 acts to promote work style reform. 2019.  
478 [https://www.mhlw.go.jp/english/policy/employ-labour/labour-](https://www.mhlw.go.jp/english/policy/employ-labour/labour-standards/dl/201904kizyun.pdf)  
479 [standards/dl/201904kizyun.pdf](https://www.mhlw.go.jp/english/policy/employ-labour/labour-standards/dl/201904kizyun.pdf)
- 480 [41] Kutzleb J, Rigolosi R, Fruhschien A, Reilly M, Shaftic AM, Fruhschien A, et al. Nurse  
481 practitioner care model: Meeting the health care challenges with a collaborative team. *Nurs*  
482 *Econ*, 2015; 33(6): 297–305.

483

## 484 **Supporting information**

485 S1 Table. Association of length of stay in the ED with care provider and each variable.

486 S2 Table. Association of length of stay in the ED with care leader, replacing trauma with either  
487 Outcomes, CT, or XP variables.
